# Supplementary material for: Acquisition of the Conjugative Virulence Plasmid From a CG23 Hypervirulent Klebsiella pneumoniae Strain Enhances Bacterial Virulence
Source: PubMed Central journal article supplement (PMC8485780; doi:10.3389/fcimb.2021.752011), 2021-09-09
Supplement: DataSheet_1.pdf [file DataSheet_1.pdf]

# **Acquisition of the conjugative virulence plasmid from a CG23 hypervirulent *Klebsiella pneumoniae* strain enhances bacterial virulence**

## SUPPLEMENTARY DATA

**Figure S1. MUMmer-based comparison of plasmids of transconjugants and referenced plasmids.** (A) Comparison of plasmids of the transconjugant HS11286-vir2-pK2606 and referenced plasmids of HS11286 and K2606 strains. (B) Comparison of plasmids of the transconjugant J53-vir2-pK2606 and referenced plasmids of K2606 strains. The abscissa indicates the plasmid contigs of transconjugants and the ordinate the reference plasmids.

**Figure S2. Growth curve of strains and transconjugants.** (A) Growth curve of HS11286 and HS11286-vir2-pK2606. (B) Growth curve of J53 and J53-vir2-pK2606. y axis, optical densities (OD) of broth cultures at 600 nm; x axis, time of growth (hours).

**Figure S3. Siderophore production and virulence levels of JS187 and JS187-vir2-pK2606.** (A) Quantitative siderophore production of JS187 and JS187-vir2-pK2606. A significance of siderophore production of JS187 and JS187-vir2-pK2606 was observed (\*\*\*\* $P < 0.0001$ ). An unpaired two-sided Student's t-test was performed. Each data point was repeated three times ( $n = 3$ ). The virulence level of JS187 and JS187-vir2-pK2606 as depicted in a larvae wax infection model (B) and a mouse infection model (C). Survival of mice ( $n = 8$ ) infected by each *K. pneumoniae* strain at 72 h is shown. Hypervirulent NTUH-K2044 was used as a positive control. A log-rank (Mantel–Cox) test was performed for the indicated curves. A significant difference ( $P < 0.001$  in both B and C) was observed between JS187 and JS187-vir2-pK2606.

**Table S1. Antimicrobial susceptibilities of K2606, HS11286, J53, and their transconjugants.**

**Table S2. The characteristics of pK2606-like conjugative virulence plasmids.**

**Table S3. Primers used in this study.**

A

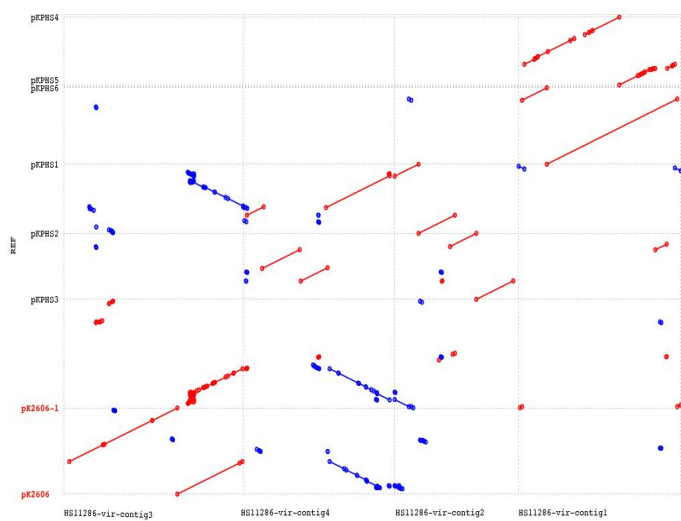

B

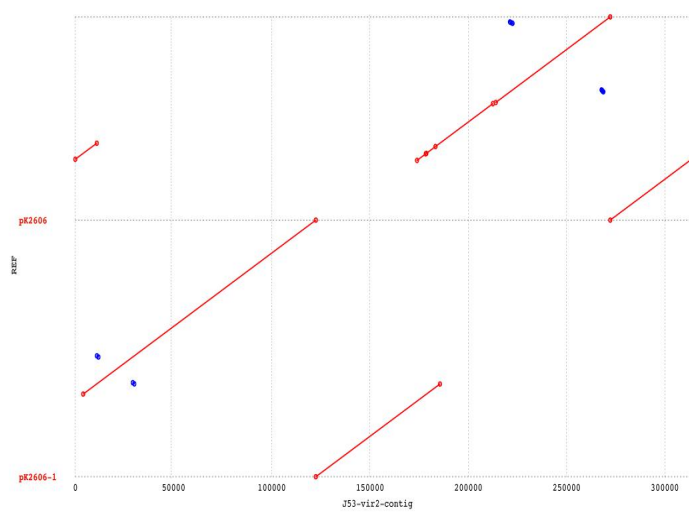

Figure S1. MUMmer-based comparison of plasmids of transconjugants and referenced plasmids. The abscissa indicates the plasmid contigs of transconjugants and the ordinate the reference plasmids.

A

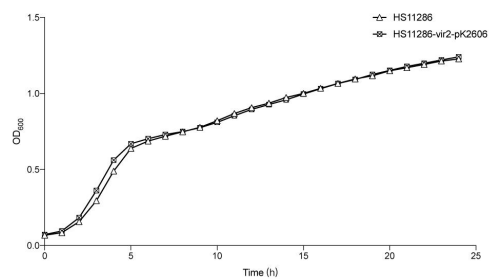

B

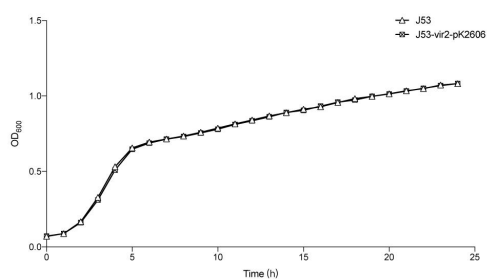

Figure S2. Growth curve of strains and transconjugants. y axis, optical densities (OD) of broth cultures at 600 nm; x axis, time of growth (hours).

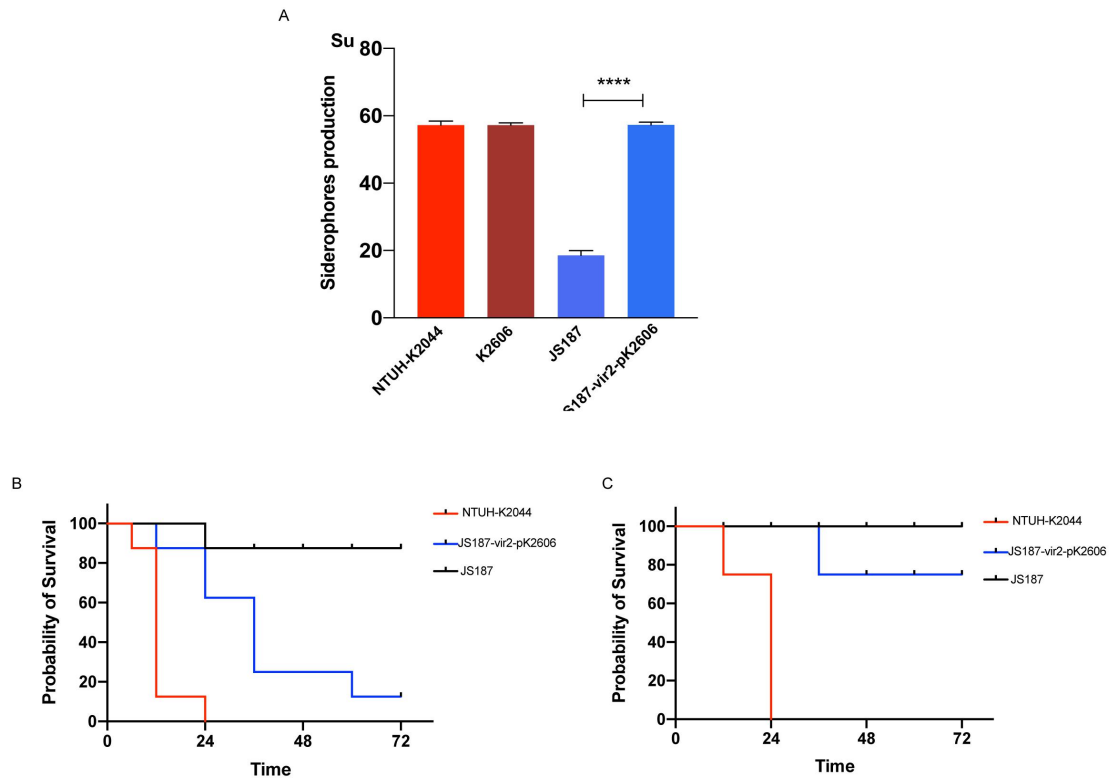

Figure S3. Siderophore production and virulence levels of JS187 and JS187-vir2-pK2606. A significance of siderophore production of JS187 and JS187-vir2-pK2606 was observed ( $***P < 0.0001$ ). An unpaired two-sided Student's t-test was performed. Each data point was repeated three times ( $n = 3$ ).

Table S1. Antimicrobial susceptibilities of K2606, HS11286, J53, and their transconjugants

| Strains                | STs  | bacterial species    | MIC ( $\mu\text{g ml}^{-1}$ ) <sup>a</sup> |        |        |     |     |       |     |     |     |      |            |       |      |      |
|------------------------|------|----------------------|--------------------------------------------|--------|--------|-----|-----|-------|-----|-----|-----|------|------------|-------|------|------|
|                        |      |                      | AMK                                        | SAM    | TZP    | CZO | CXM | CRO   | FEP | CHL | GEN | LVX  | SXT        | MEM   | TGC  | NIT  |
| K2606                  | ST23 | <i>K. pneumoniae</i> | <8                                         | 32/16  | <8/4   | >16 | >64 | >8    | 2   | 8   | <1  | 2    | >8/152     | <0.25 | 1    | 128  |
| HS11286                | ST11 | <i>K. pneumoniae</i> | >128                                       | >64/32 | >256/4 | >16 | >64 | >8    | 16  | >64 | >32 | 2    | >8/152     | 64    | <0.5 | 256  |
| JS187                  | ST11 | <i>K. pneumoniae</i> | >128                                       | >64/32 | >256/4 | >16 | >64 | >8    | >64 | >64 | >32 | 8    | >8/152     | 32    | <0.5 | 256  |
| J53                    | -    | <i>E. coli</i>       | <8                                         | 4/2    | <8/4   | 1   | 8   | <0.25 | <2  | 8   | <1  | <0.5 | <0.25/4.75 | <0.25 | <0.5 | <8   |
| <b>Transconjugants</b> |      |                      |                                            |        |        |     |     |       |     |     |     |      |            |       |      |      |
| HS11286-vir2-pK2606    | ST11 | <i>K. pneumoniae</i> | >128                                       | >64/32 | >256/4 | >16 | >64 | >8    | 16  | >64 | >32 | 8    | >8/152     | 64    | <0.5 | 128  |
| JS187-vir2-pK2606      | ST11 | <i>K. pneumoniae</i> | >128                                       | >64/32 | >256/4 | >16 | >64 | >8    | >64 | >64 | >32 | 16   | >8/152     | 32    | 1    | >256 |
| J53-vir2-pK2606        | -    | <i>K. pneumoniae</i> | <8                                         | 8/4    | <8/4   | 2   | 4   | <0.25 | <2  | 8   | 2   | <0.5 | <0.25/4.75 | <0.25 | <0.5 | <8   |

<sup>a</sup>AMK, amikacin; SAM, ampicillin/sulbactam; TZP, piperacillin/tazobactam; CZO, ceftazolin; CXM, cefuroxime; CRO, ceftriaxone; FEP, cefepime; CHL, chloramphenicol; GEN, gentamicin; LVX, levofloxacin; SXT, trimethoprim/sulphamethoxazole; MEM, meropenem; TGC, tigecycline; NIT, nitrofurantion.

Table S2. The characteristics of pK2606-like conjugative virulence plasmids.

| Plasmids        | Accession number | Strain       | Chromosome | MLST | Isolated Year | Isolated countries |
|-----------------|------------------|--------------|------------|------|---------------|--------------------|
| p205880-1       | CP030303.1       | 205880       | CP030302.1 | 290  | 2012          | China: Beijing     |
| pSCH6109-Vir    | CP050860.1       | SCH6109      | CP050858.1 | 37   | 2016          | China: Shanghai    |
| pM1023-4Ar.1    | CP063852.1       | M1023-4Ar    | CP063851.1 | 1    | 2019          | China: Baoding     |
| pM1026-3Ar.1    | CP063859.1       | M1026-3Ar    | CP063858.1 | 1    | 2019          | China: Baoding     |
| pBM336-2-1      | CP063914.1       | BM336-2-1    | CP063913.1 | 36   | 2019          | China: Tangshan    |
| pfekpn2511-1    | CP068973.1       | fekpn2511    | CP068972.1 | 290  | 2019          | China: Hengyang    |
| pRGF172-1-214k  | CP075277.1       | RGF172-1     | CP075275.1 | 290  | 2019          | China: Nantong     |
| pRGF99-1-214k   | CP075553.1       | RGF99-1      | CP075552.1 | 967  | 2019          | China: Nantong     |
| pK186_1         | CP076519.1       | K186         | CP076518.1 | 437  | 2017          | China: Hangzhou    |
| pR46-270        | CP035776.1       | R46          | CP035777.1 | 3796 | 2015          | China: Wenzhou     |
| pBSI128_vf_res  | MT269849.1       | BSI128       | -          | -    | -             | -                  |
| pKPC-063001     | MZ156798.1       | KP63         | -          | -    | -             | -                  |
| p130411-38618_1 | MK649826.1       | 130411-38618 | -          | -    | -             | -                  |
| pW09308-1FIK    | MN821363.1       | 9308         | -          | -    | -             | -                  |
| pKpn47-FIHK     | MN821369.1       | Kpn47        | -          | -    | -             | -                  |

Table S3. Primers used in this study

| Name                            | Sequences (5'-3')                             |
|---------------------------------|-----------------------------------------------|
| For constructing of pK2606-kana |                                               |
| Up-F                            | CTGACTGGTTACTCCGGCAA                          |
| Up-R                            | cctacacaatcgctcaagacgtACCTGTCATCCATACTGCGT    |
| Kana-F                          | ACGTCTTGAGCGATTGTGTAGG                        |
| Kana-R                          | AGCCATGGTCCATATGAATATCCTC                     |
| Down-F                          | gaggatattcatatggaccatggctAGCAGCAGGGTCGCATAATA |
| Down-R                          | TCAGTCGTTTTTCGTGCCGTT                         |
| For screening transconjugants   |                                               |
| iucA-F                          | GCTTATTTCTCCCAACCC                            |
| iucA-R                          | TCAGCCCTTTAGCGACAAG                           |
| KPC-F                           | CTGTCTTGTCTCTCATGGCC                          |
| KPC-R                           | CCTCGCTGTGCTTGTGCATCC                         |
| oqxA-F                          | CCAAAGTGACCGCCCCTATT                          |
| oqxA-R                          | GACGATGACGCTATCCCCAG                          |
| ICE-F                           | GGTGAGCTGACGAATGGATT                          |
| ICE-R                           | TTTCTCGGCACCAACTCAAA                          |
